# Supplementary material for: Facile solvothermal decomposition synthesis of single phase ZnBi38O60nanobundles for sensitive detection of 4-nitrophenol
Source: Royal Society of Chemistry journal article supplement (doi:10.1039/c7nj00436b), 2017-01-01
Supplement: c7nj00436b1.pdf [file c7nj00436b1.pdf]

## Supplementary Information

Received 00th January 20xx,  
Accepted 00th January 20xx

DOI: 10.1039/x0xx00000x

www.rsc.org/

### Facile solvothermal decomposition synthesis of single phase $\text{ZnBi}_{38}\text{O}_{60}$ nanobundles for sensitive detection of 4-nitrophenol

A. Padmanaban<sup>a</sup>, T. Dhanasekaran<sup>a</sup>, R. Manigandan<sup>a</sup>, S. Praveen Kumar<sup>a</sup>, G. Gnanamoorthy<sup>a</sup>,  
A. Stephen<sup>b</sup> and V. Narayanan<sup>a\*</sup>

<sup>a</sup>Department of Inorganic Chemistry, University of Madras, Chennai-600 025.

<sup>b</sup>Department of Nuclear Physics, University of Madras, Chennai-600 025.

\*Corresponding Author: V.Narayanan (vnnara@yahoo.co.in)

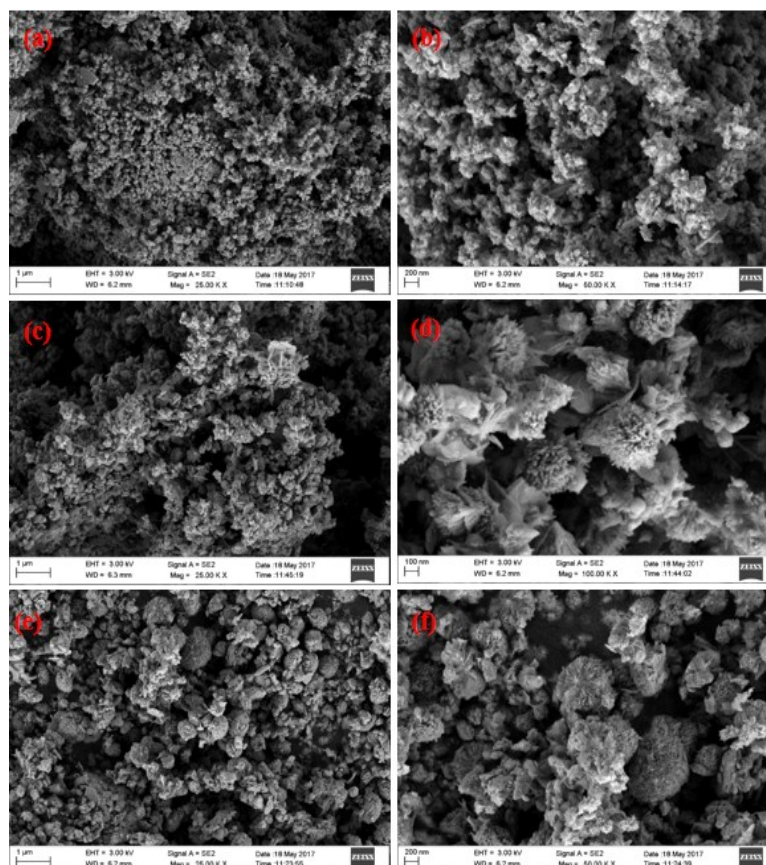

**Fig. S1:** Time dependent morphology of  $\text{ZnBi}_{38}\text{O}_{60}$  nanostructures. FESEM images of  $\text{ZnBi}_{38}\text{O}_{60}$  collected at (a, b) 2 hours, (c, d) 4 hours and (e, f) 6 hours reaction.

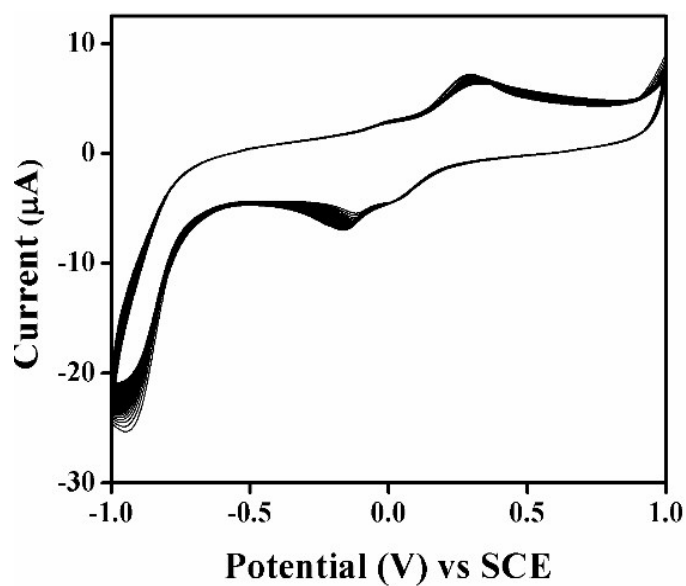

Fig S2: The CV's (20 cycles) of 10×10<sup>-6</sup> M 4-NP at ZnBi<sub>38</sub>O<sub>60</sub>/GCE.

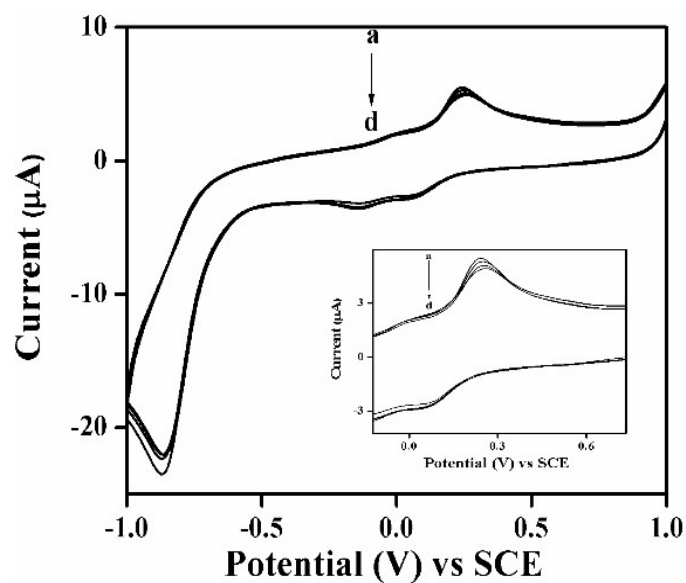

Fig S3: The storage stability of ZnBi<sub>38</sub>O<sub>60</sub>/GCE (at 4 days time interval)

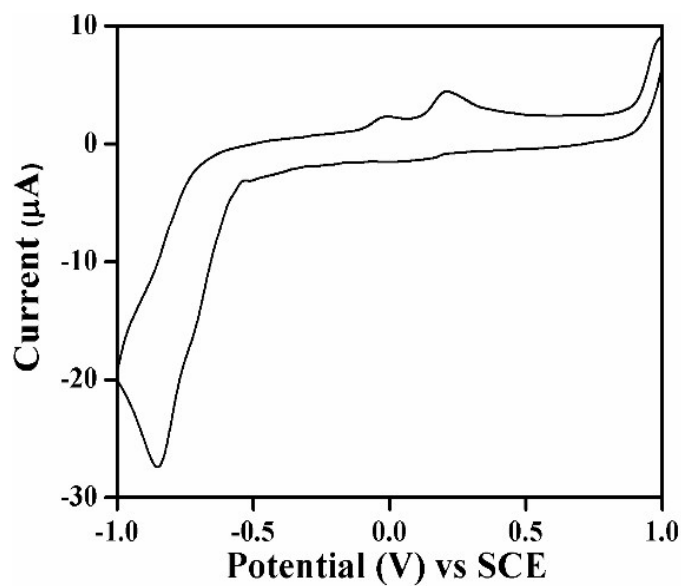

**Fig. S4:** Cyclic voltammogram of  $10 \times 10^{-6}$  M 4-NP in presence of  $20 \times 10^{-6}$  M each of 2-NP, 2,4-DNP, 2-CIP and 4-CIP as interfering agents at  $\text{ZnBi}_{38}\text{O}_{60}/\text{GCE}$  at the scan rate of  $50 \text{ mVs}^{-1}$ .
